# Supplementary material
Source: Research Square preprint supplement (doi:10.21203/rs.3.rs-10056258/v1)
Supplement: Supplementary file 1 [file 8492dc54993621e46abc6399.docx]

**Supplementary File 2. Illustrative Interview Excerpts**

The following excerpts are provided as examples of the semi-structured interviews conducted with participants. Identifying information has been removed to ensure confidentiality.

**Interview Excerpt 1 – Generation Z Student (Participant S1)**

**Interviewer:** Could you describe your overall experience of learning in medical university?

**Participant:** Overall, it has been positive; however, most teaching approaches remain traditional. We tend to learn better through case-based learning and interactive educational methods.

**Interviewer:** What are your views on lecture-based classes?

**Participant:** Long lectures often reduce our concentration. Learning becomes much more effective when sessions are shorter and include real-life clinical examples.

**Interviewer:** What role does technology play in your learning?

**Participant:** Technology is very important for us. We learn a great deal from online resources, although it can sometimes become a source of distraction.

**Interviewer:** How would you describe your relationship with faculty members?

**Participant:** We would like faculty members to be more accessible. At times, there seems to be a considerable distance between students and professors.

**Interview Excerpt 2 – Generation Z Student (Participant S2)**

**Interviewer:** How would you describe your educational experience?

**Participant:** The education is generally good, but it is highly theoretical. We prefer practical and collaborative learning experiences.

**Interviewer:** What helps you learn more effectively?

**Participant:** I feel more motivated when the content is clearly connected to clinical practice and future professional responsibilities.

**Interviewer:** How do you experience academic pressures?

**Participant:** The workload can be intense, and maintaining a balance between academic responsibilities and personal life is very important to us.

**Interviewer:** How do you perceive feedback from faculty members?

**Participant:** Feedback is most helpful when it is timely, clear, and specific.

**Interview Excerpt 3 – Generation Z Student (Participant S3)**

**Interviewer:** What is your preferred learning style?

**Participant:** I prefer visual and concise learning formats. Educational videos are particularly helpful.

**Interviewer:** Do you find traditional teaching methods effective?

**Participant:** Not always. They often become tiring and reduce engagement.

**Interviewer:** How would you describe your interactions with faculty members?

**Participant:** We would appreciate more approachable and less formal relationships with faculty members.

**Interviewer:** What motivates you to learn?

**Participant:** Understanding why a topic is important and how it will be useful in my future career strongly motivates me.

**Interview Excerpt 4 – Faculty Member (Participant F1)**

**Interviewer:** What has been your experience teaching the current generation of students?

**Participant:** Today's students are different. They tend to learn quickly, but sustaining their attention can be challenging.

**Interviewer:** What is the main challenge you encounter?

**Participant:** Traditional lectures are no longer as effective as they once were. Greater interaction and student engagement are needed.

**Interviewer:** How do you view the role of technology?

**Participant:** Technology offers valuable opportunities, but if not used appropriately, it may encourage superficial learning.

**Interview Excerpt 5 – Faculty Member (Participant F2)**

**Interviewer:** How does Generation Z differ from previous generations?

**Participant:** They are more independent and expect quicker communication and responses.

**Interviewer:** How has the faculty–student relationship changed?

**Participant:** Hierarchical relationships are less accepted, and interactions have become more informal.

**Interviewer:** What are your views on academic pressure?

**Participant:** It may appear that students are less tolerant of pressure; however, I believe they place greater importance on mental health and well-being.

**Interviewer:** What changes would you recommend?

**Participant:** Teaching methods and curricula should be updated, with a stronger emphasis on interactive learning approaches.

**Interview Excerpt 6 – Faculty Member (Participant F3)**

**Interviewer:** What is it like teaching Generation Z students?

**Participant:** Teaching this generation requires more active and learner-centered approaches. Lecturing alone is no longer sufficient.

**Interviewer:** What opportunities do you see?

**Participant:** Their familiarity with technology is a major advantage and can be leveraged to enhance learning.

**Interviewer:** What challenges do you observe?

**Participant:** Distractions associated with smartphones and social media are among the most significant challenges.

**Interviewer:** What changes are needed?

**Participant:** Faculty development initiatives and curriculum revision are essential to better meet the needs of this generation.

**Note:** These excerpts are presented for illustrative purposes only and do not represent the full interview transcripts used in the analysis. All participant identifiers have been anonymized to maintain confidentiality.
