# Supplementary material
Source: Research Square preprint supplement (doi:10.21203/rs.3.rs-10056258/v1)
Supplement: Supplementary file 2 [file 8cedeaf3a634c665730d89b7.docx]

**Supplementary File 1. Semi-Structured Interview Guide**

**Exploring the Generational Gap in Medical Education and Identifying Generation Z–Related Challenges and Opportunities from the Perspectives of Students and Faculty Members: A Qualitative Study**

**Part A. Interview Guide for Students (Generation Z)**

**Opening Question**

1. Could you describe your overall experience of learning and studying in medical university?

**Teaching and Learning Preferences**

1. Which teaching and learning methods do you find most effective for your learning, and why?
   - Probe: Can you provide examples of methods that have enhanced your understanding or engagement?
2. What are your views on traditional lecture-based teaching methods?
   - Probe: What aspects do you find useful or challenging?

**Technology and Learning**

1. What role does technology play in your learning process?
2. Do you think technology facilitates your learning or creates distractions? Please explain.
   - Probe: Can you provide examples from your educational experience?

**Student–Faculty Relationships**

1. How would you describe your relationship with faculty members?
2. Do you perceive any distance or gap between students and faculty members?
   - Probe: In what ways is this gap manifested?
3. How do you receive and evaluate feedback provided by faculty members?
   - Probe: What type of feedback do you consider most helpful?

**Educational Pressures and Motivation**

1. How do academic demands and educational pressures affect your study–life balance?
2. What factors most strongly motivate you to learn a particular subject?
   - Probe: How do interest, relevance, or teaching style influence your motivation?
3. How important is the relevance of educational content to your future career?
   - Probe: Can you describe how career relevance affects your engagement with learning?

**Recommendations**

1. What suggestions do you have for improving medical education for students of your generation?

**Part B. Interview Guide for Faculty Members**

**Opening Question**

1. Could you describe your experience of teaching Generation Z students in medical education?

**Perceptions of Generational Differences**

1. What differences have you observed between Generation Z students and previous generations of students?
   - Probe: Differences in learning styles, communication patterns, expectations, or professional attitudes.
2. Which teaching approaches do you believe are most effective for Generation Z students?
3. What challenges do you encounter when using traditional lecture-based teaching methods?
   - Probe: How do students respond to these methods?

**Faculty–Student Relationships**

1. How would you evaluate the faculty–student relationship in contemporary medical education?
2. Have you observed changes in students’ expectations regarding communication and interaction with faculty members?
   - Probe: How have these expectations evolved over time?
3. How should feedback be provided to students to maximize its effectiveness?
   - Probe: What characteristics make feedback meaningful for Generation Z learners?

**Technology in Medical Education**

1. How do you evaluate the role of technology in medical education?
2. Do you consider technology primarily an opportunity or a challenge in medical education? Why?
   - Probe: What advantages and disadvantages have you observed?

**Resilience, Curriculum, and Educational Policy**

1. How do you perceive students’ attitudes toward academic pressure, resilience, and coping with challenges?
2. What changes, if any, do you believe are needed in the curriculum or educational policies to better address the needs of Generation Z students?
3. What strategies would you recommend for reducing the generational gap in medical education and improving educational effectiveness?

**Note:** Additional probing questions were used when necessary to clarify participants’ responses and to explore emerging concepts in greater depth.
